# Supplementary material for: Evaluating Cost-Effectiveness Models for Pharmacologic Interventions in Adults with Heart Failure: A Systematic Literature Review
Source: PubMed Central journal article supplement — Pharmacoeconomics. 2018 Dec 31;37(3):359–89. doi: 10.1007/s40273-018-0755-x (PMC6386015; doi:10.1007/s40273-018-0755-x), 2018-12-31
Supplement: 40273_2018_755_MOESM1_ESM.pdf [file 40273_2018_755_MOESM1_ESM.pdf]

Di Tanna GL, Bychenkova A, O'Neill F, Wirtz HS, Miller P, Ó Hartaigh B, Globe G

**Correspondence to:** Gian Luca Di Tanna, Health Economics Senior Manager, Global Health Economics, Amgen (Europe) GmbH Suurstoffi 22, P.O. Box 94, CH-6343 Rotkreuz, Switzerland; Tel: +41 (0)41 369 25 11; Email: gditanna@amgen.com

### **Online Resource 1.** Search strategy

In COCHRANE LIBRARY database we used the following MeSH descriptors (published from 1997 to 2017, in Technology Assessments and Economic Evaluations): '[Heart Failure] explode all trees', 'heart next failure', 'chf or hf', 'cardiomyopath\*', '(cardiac next failure) or (cardiac next insufficiency)', '(myocardial next failure) or (myocardial next insufficiency)'.

In MEDLINE and EMBASE (via Ovid) we searched for the following disease terms: 'exp \*heart failure/', '((cardiac\* or heart\* or myocardi\*) adj2 (failure\* or incompet\* or insufficien\* or arrest\*)).ti,ab.'; we search for the following economic evaluation terms: 'health economics/ or exp economic evaluation/ or cost-benefit analysis/ or cost benefit/ or cost effectiveness analysis/ or cost minimization analysis/ or "costs and cost analysis"/ or quality-adjusted life years/ or value of life/', 'Economics/ or Socioeconomics/ or economic aspect/ or health economics/', '(cost\* adj (effective\* or utilit\* or consequence\* or benefit\* or minimi\*)).tw.', '(economic evaluation\* or economic analysis or QALY\* or DALY\* or quality adjusted or adjusted life year\* or disability adjusted life or qald\* or qtime\* or life year\* gained or ICER).ti,ab,kf.'.

In addition, we applied the following exclusion terms: '(comment or editorial or meta-analysis or practice-guideline or review or letter or journal correspondence).pt.', '(book or conference paper or editorial or letter or review).pt.', '(animal\* not human\*).sh,hw.', '(case stud\* or case report\*).ti.', '(conference abstract or conference review).pt.'.
